# Supplementary material
Source: PubMed Central journal article supplement (PMC9923603)
Supplement: PEDS_20162642SupplementaryData.pdf [file PEDS_20162642SupplementaryData.pdf]

# Supplemental Information

**SUPPLEMENTAL TABLE 3** PHIS Database Codebook

| Variable                                                                                                                                                                             | ICD-9 Code             | Clinical Transaction Classification Code |
|--------------------------------------------------------------------------------------------------------------------------------------------------------------------------------------|------------------------|------------------------------------------|
| Case definition                                                                                                                                                                      |                        |                                          |
| CF with pulmonary manifestations and IV OR                                                                                                                                           | 277.02                 |                                          |
| CF and IV AND 1 of the following:                                                                                                                                                    | 277.00, 277.03, 277.09 |                                          |
| Acute upper respiratory tract infections of multiple or unspecified sites                                                                                                            | 465.x                  |                                          |
| Acute bronchitis and bronchiolitis                                                                                                                                                   | 466.x                  |                                          |
| Pneumonia                                                                                                                                                                            | 486.x                  |                                          |
| Influenza                                                                                                                                                                            | 487.x                  |                                          |
| Bronchitis (not specified as acute or chronic)                                                                                                                                       | 490.x                  |                                          |
| Chronic bronchitis                                                                                                                                                                   | 491.x                  |                                          |
| Bronchiectasis                                                                                                                                                                       | 494.x                  |                                          |
| Exclusion criteria                                                                                                                                                                   |                        |                                          |
| Malignancy flag Clinical Transaction Classification code                                                                                                                             |                        | Malignancy                               |
| History of organ transplant (includes bone marrow, eye, intestine, kidney, liver, lung, and pancreas)                                                                                | 996.8x                 |                                          |
| Other postoperative complication:                                                                                                                                                    |                        |                                          |
| Peritoneal adhesions with obstruction                                                                                                                                                | 560.81                 |                                          |
| Postoperative heterotopic calcification                                                                                                                                              | 728.59                 |                                          |
| Other postoperative infection (abscess: postoperative, intra-abdominal postoperative, stitch postoperative, subphrenic postoperative, wound postoperative, septicemia postoperative) | 998.59                 |                                          |
| Persistent postoperative fistula                                                                                                                                                     | 998.6                  |                                          |
| Acute pancreatitis                                                                                                                                                                   | 577.0                  |                                          |
| Mechanical complication of:                                                                                                                                                          |                        |                                          |
| Other and unspecified infection due to central venous catheter                                                                                                                       | 999.31                 |                                          |
| Bloodstream infection due to central venous catheter                                                                                                                                 | 999.32                 |                                          |
| Fitting and adjustment of vascular catheter                                                                                                                                          | V58.81                 |                                          |
| Mechanical complication of gastrostomy                                                                                                                                               | 536.42                 |                                          |
| Mechanical complication of colostomy and enterostomy                                                                                                                                 | 569.62                 |                                          |
| Mechanical complication of other vascular device, implant, and graft                                                                                                                 | 996.1                  |                                          |
| Mechanical complication of nervous system device, implant, and graft                                                                                                                 | 996.2                  |                                          |
| Due to insulin pump                                                                                                                                                                  | 996.57                 |                                          |
| Due to other implant and internal device, not elsewhere specified                                                                                                                    | 996.59                 |                                          |
| Demographic variables                                                                                                                                                                |                        |                                          |
| Pancreatic medication use                                                                                                                                                            |                        |                                          |
| Digestive enzymes and/or Lactase enzyme                                                                                                                                              |                        | 147758                                   |
| Liver medication use Ursodiol                                                                                                                                                        |                        | 142027                                   |
| Diabetes medication use Insulin                                                                                                                                                      |                        | 147865                                   |
| Gastrostomy present                                                                                                                                                                  |                        | 153100                                   |
| Any respiratory support                                                                                                                                                              |                        | 541141                                   |
| Oxygen use                                                                                                                                                                           |                        | 521171                                   |
| Mechanical ventilation use                                                                                                                                                           |                        | 521166                                   |
| Mechanical ventilation use                                                                                                                                                           |                        | 521161                                   |
| Chronic medications                                                                                                                                                                  |                        |                                          |
| Dornase alfa                                                                                                                                                                         |                        | 183015                                   |
| Albuterol                                                                                                                                                                            |                        | 181211                                   |
| Hypertonic saline                                                                                                                                                                    |                        | 188311                                   |
| Azithromycin                                                                                                                                                                         |                        | 122421                                   |
| (Chronic if given orally, given >25% of hospital days, given <75% of hospital days)                                                                                                  |                        |                                          |
| Corticosteroids                                                                                                                                                                      |                        |                                          |
| Prednisone                                                                                                                                                                           |                        | 154083                                   |
| Prednisolone                                                                                                                                                                         |                        | 154081                                   |
| Methylprednisolone                                                                                                                                                                   |                        | 154071                                   |

**TABLE 3** Continued

| Variable                                                                                        | ICD-9 Code | Clinical Transaction Classification Code |
|-------------------------------------------------------------------------------------------------|------------|------------------------------------------|
| Dexamethasone                                                                                   |            | 154035                                   |
| Lung function testing                                                                           |            |                                          |
| Lung function testing performed (coded as airway measurement, which included FEV <sub>1</sub> ) |            | 521103                                   |
| Antibiotics                                                                                     |            |                                          |
| Amikacin sulfate                                                                                |            | 121101                                   |
| Aztreonam                                                                                       |            | 124121                                   |
| Cefepime                                                                                        |            | 122252                                   |
| Ceftazidime                                                                                     |            | 122221                                   |
| Ceftriaxone                                                                                     |            | 122231                                   |
| Ciprofloxacin                                                                                   |            | 123201                                   |
| Clindamycin                                                                                     |            | 124143                                   |
| Colistimethate sodium                                                                           |            | 124147                                   |
| Doxycycline                                                                                     |            | 123115                                   |
| Erythromycin                                                                                    |            | 122401                                   |
| Gentamicin                                                                                      |            | 121105                                   |
| Levofloxacin                                                                                    |            | 123215                                   |
| Linezolid                                                                                       |            | 124137                                   |
| Meropenem                                                                                       |            | 124118                                   |
| Metronidazole                                                                                   |            | 124164                                   |
| Minocycline                                                                                     |            | 123131                                   |
| Piperacillin sodium and tazobactam sodium                                                       |            | 121265                                   |
| Rifampin                                                                                        |            | 126245                                   |
| Sulfamethoxazole and trimethoprim                                                               |            | 124451                                   |
| Ticarcillin disodium and clavulanate sodium                                                     |            | 121271                                   |
| Tobramycin sulfate                                                                              |            | 121135                                   |
| Vancomycin (HCl)                                                                                |            | 124133                                   |

FEV<sub>1</sub>, forced expiratory volume in 1 second.

**SUPPLEMENTAL TABLE 5** Top 10 IV Antibiotics Used in All Pulmonary Exacerbations

| Top 10 IV Antibiotics                          | IV Antibiotic Use Frequency ( <i>N</i> = 4827), % |
|------------------------------------------------|---------------------------------------------------|
| Tobramycin                                     | 58.5                                              |
| Ceftazidime                                    | 27.3                                              |
| Vancomycin                                     | 18.6                                              |
| Piperacillin sodium and tazobactam sodium      | 18.0                                              |
| Cefepime                                       | 12.8                                              |
| Ticarcillin disodium and clavulanate potassium | 12.7                                              |
| Meropenem                                      | 11.0                                              |
| Clindamycin                                    | 4.5                                               |
| Ciprofloxacin                                  | 4.5                                               |
| Ceftriaxone                                    | 4.1                                               |

**SUPPLEMENTAL TABLE 4** List of Included CFF-Accredited PHIS-Participating Pediatric Centers (*N* = 38)

|                                                                                               |
|-----------------------------------------------------------------------------------------------|
| Akron Children's Hospital (Akron, OH)                                                         |
| All Children's Hospital (St Petersburg, FL)                                                   |
| Ann and Robert H. Lurie Children's Hospital of Chicago (Chicago, IL)                          |
| Arkansas Children's Hospital (Little Rock, AK)                                                |
| Boston Children's Hospital (Boston, MA)                                                       |
| Children's Healthcare of Atlanta (Atlanta, GA)                                                |
| Children's Hospitals and Clinics of Minnesota (Minneapolis, MN)                               |
| Children's Hospital and Medical Center (Omaha, NE)                                            |
| Children's Hospital Colorado (Denver, CO)                                                     |
| Children's Hospital of Los Angeles (Los Angeles, CA)                                          |
| Children's Hospital of New Orleans (New Orleans, LA)                                          |
| Children's Hospital of Orange County (Orange County, CA)                                      |
| Children's Hospital of Pittsburgh of University of Pittsburgh Medical Center (Pittsburgh, PA) |
| Children's Hospital of the King's Daughters (Norfolk, VA)                                     |
| Children's Hospital of Wisconsin (Milwaukee, WI)                                              |
| Children's Medical Center (Dallas, TX)                                                        |
| Children's of Alabama (Birmingham, AL)                                                        |
| Children's National Medical Center (Washington, DC)                                           |
| Cincinnati Children's Hospital Medical Center (Cincinnati, OH)                                |
| Connecticut Children's Medical Center (Hartford, CT)                                          |
| Cook Children's (Fort Worth, TX)                                                              |
| Le Bonheur Children's Medical Center (Memphis, TN)                                            |
| Lucille Packard Children's Hospital at Stanford (Palo Alto, CA)                               |
| Nationwide Children's Hospital (Columbus, OH)                                                 |
| New York–Presbyterian Morgan Stanley Children's Hospital (New York, NY)                       |
| Niklaus Children's Hospital (Miami, FL)                                                       |
| Phoenix Children's Hospital (Phoenix, AZ)                                                     |
| Primary Children's Hospital (Salt Lake City, UT)                                              |
| Rady Children's Hospital of San Diego (San Diego, CA)                                         |
| Riley Hospital for Children at Indiana University Health (Indianapolis, IN)                   |
| Seattle Children's Hospital (Seattle, WA)                                                     |
| St Louis Children's Hospital (St Louis, MI)                                                   |
| Texas Children's Hospital (Houston, TX)                                                       |
| The Children's Hospital of Philadelphia (Philadelphia, PA)                                    |
| University of California at San Francisco Benioff Children's Hospital Oakland (Oakland, CA)   |
| Valley Children's Hospital (Madera, CA)                                                       |
| Women and Children's Hospital of Buffalo (Buffalo, NY)                                        |
| Yale–New Haven Children's Hospital (New Haven, CT)                                            |

**SUPPLEMENTAL TABLE 7** Top 10 IV Antibiotics on Admission When 2 IV Antibiotics Were Used

| IV Antibiotic 1                                | IV Antibiotic 2 | IV Antibiotic Use Frequency ( <i>n</i> = 2732), % |
|------------------------------------------------|-----------------|---------------------------------------------------|
| Ceftazidime                                    | Tobramycin      | 20.9                                              |
| Piperacillin sodium and tazobactam sodium      | Tobramycin      | 15.7                                              |
| Ticarcillin disodium and clavulanate potassium | Tobramycin      | 13.7                                              |
| Cefepime                                       | Tobramycin      | 12.1                                              |
| Meropenem                                      | Tobramycin      | 6.7                                               |
| Ceftazidime                                    | Vancomycin      | 2.2                                               |
| Piperacillin sodium and tazobactam sodium      | Vancomycin      | 1.5                                               |
| Cefepime                                       | Vancomycin      | 1.2                                               |
| Piperacillin sodium and tazobactam sodium      | Gentamicin      | 0.9                                               |
| Ceftazidime                                    | Ciprofloxacin   | 0.8                                               |

**SUPPLEMENTAL TABLE 6** Top 10 IV Antibiotics on Admission When Only 1 IV Antibiotic Was Used

| Top 10 IV Antibiotics                          | IV Antibiotic Use Frequency ( <i>n</i> = 997), % |
|------------------------------------------------|--------------------------------------------------|
| Vancomycin                                     | 13.9                                             |
| Ampicillin sodium and sulbactam sodium         | 10.8                                             |
| Cefazolin                                      | 9.5                                              |
| Ceftriaxone                                    | 9.1                                              |
| Piperacillin sodium and tazobactam sodium      | 7.6                                              |
| Oxacillin                                      | 6.0                                              |
| Ceftazidime                                    | 5.7                                              |
| Clindamycin                                    | 5.1                                              |
| Ticarcillin disodium and clavulanate potassium | 5.0                                              |
| Cefepime                                       | 4.9                                              |

**SUPPLEMENTAL TABLE 9** Top 10 Oral Antibiotics Used in All Pulmonary Exacerbations

| Top 10 Oral Antibiotics       | Oral Antibiotic Use Frequency ( <i>n</i> = 1784), % |
|-------------------------------|-----------------------------------------------------|
| Trimethoprim-sulfamethoxazole | 46.2                                                |
| Ciprofloxacin                 | 10.7                                                |
| Linezolid                     | 8.7                                                 |
| Minocycline                   | 8.7                                                 |
| Rifampin                      | 7.3                                                 |
| Doxycycline                   | 7.0                                                 |
| Erythromycin                  | 5.8                                                 |
| Metronidazole                 | 5.2                                                 |
| Levofloxacin                  | 5.0                                                 |
| Clindamycin                   | 4.9                                                 |

**SUPPLEMENTAL TABLE 10** Top 5 Inhaled Antibiotics Used in All Pulmonary Exacerbations

| Top 5 Inhaled Antibiotics | Inhaled Antibiotic Use Frequency ( <i>n</i> = 1043), % |
|---------------------------|--------------------------------------------------------|
| Tobramycin                | 87.4                                                   |
| Colistimethate sodium     | 9.2                                                    |
| Amikacin                  | 2.6                                                    |
| Aztreonam                 | 2.2                                                    |
| Gentamicin                | 0.9                                                    |

**SUPPLEMENTAL TABLE 8** Top 10 IV Antibiotic Trios on Admission When at Least 3 IV Antibiotics Were Used

| IV Antibiotic 1                             | IV Antibiotic 2 | IV Antibiotic 3 | IV Antibiotic Use Frequency ( <i>n</i> = 1098), % |
|---------------------------------------------|-----------------|-----------------|---------------------------------------------------|
| Ceftazidime                                 | Tobramycin      | Vancomycin      | 13.8                                              |
| Cefepime                                    | Tobramycin      | Vancomycin      | 6.5                                               |
| Piperacillin sodium and tazobactam sodium   | Tobramycin      | Vancomycin      | 6.0                                               |
| Meropenem                                   | Tobramycin      | Vancomycin      | 5.5                                               |
| Ceftazidime                                 | Clindamycin     | Tobramycin      | 4.6                                               |
| Ceftazidime                                 | Linezolid       | Tobramycin      | 3.9                                               |
| Ticarcillin disodium and clavulanate sodium | Tobramycin      | Vancomycin      | 3.5                                               |
| Ceftazidime                                 | Meropenem       | Tobramycin      | 2.5                                               |
| Piperacillin sodium and tazobactam sodium   | Ceftazidime     | Tobramycin      | 1.9                                               |
| Ceftazidime                                 | Ciprofloxacin   | Tobramycin      | 1.5                                               |
